# Supplementary material
Source: HighWire-hosted journal article supplement (https://bmjopenquality.bmj.com/highwire/filestream/143047/field_highwire_adjunct_files/3/bmjoq-2021-001624supp004_data_supplement.pdf)
Supplement: bmjoq-2021-001624supp004_data_supplement.pdf [file bmjoq-2021-001624supp004_data_supplement.pdf]

| MRN : <a href="#">xxx</a><br>Miss for bundle due to : IVF bolus | Y/N                               | Review                                                         |
|-----------------------------------------------------------------|-----------------------------------|----------------------------------------------------------------|
| 1 Hour                                                          |                                   |                                                                |
| Antibiotics                                                     |                                   |                                                                |
| 3 Hour                                                          |                                   |                                                                |
| Antibiotics                                                     |                                   |                                                                |
| Initial Lactate                                                 |                                   |                                                                |
| Blood Cultures Before Antibiotics                               |                                   |                                                                |
| 30 cc/kg IVF or Fluid Exclusion Note (if indicated)             | only received 1 L in<br>timeframe | MD note states give 30<br>cc/kg IVF but this is not<br>ordered |
| Vital signs after IVF bolus (if fluid required as<br>above)     | n/a (fluid not given)             |                                                                |
| 6 Hour                                                          |                                   |                                                                |
| Repeat Lactate (if first > 2.0)                                 |                                   |                                                                |
| Vasopressors (if indicated)                                     |                                   |                                                                |
| Reassessment of volume status and tissue<br>perfusion           |                                   |                                                                |
